# Supplementary material for: Developmental influence on evolutionary rates and the origin of placental mammal tooth complexity
Source: PubMed Central journal article supplement — Proc Natl Acad Sci U S A. 2021 Jun 3;118(23):e2019294118. doi: 10.1073/pnas.2019294118 (PMC8202019; doi:10.1073/pnas.2019294118), 2021-06-03
Supplement: pnas.2019294118.sapp.pdf [file pnas.2019294118.sapp.pdf]

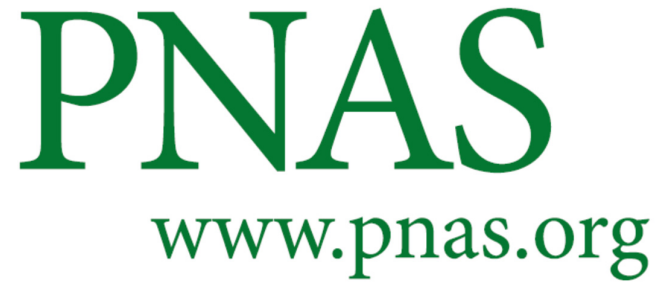

**Supplementary Information for**

Developmental influence on evolutionary rates and the origin of placental mammal tooth complexity

Aidan M. C. Couzens, Karen E. Sears, and Martin Rücklin

**Corresponding Author:** Aidan M. C. Couzens

**Email:** [acouzens@ucla.edu](mailto:acouzens@ucla.edu)

**This PDF file includes:**

Figures S1 to S11

Tables S1 to S4

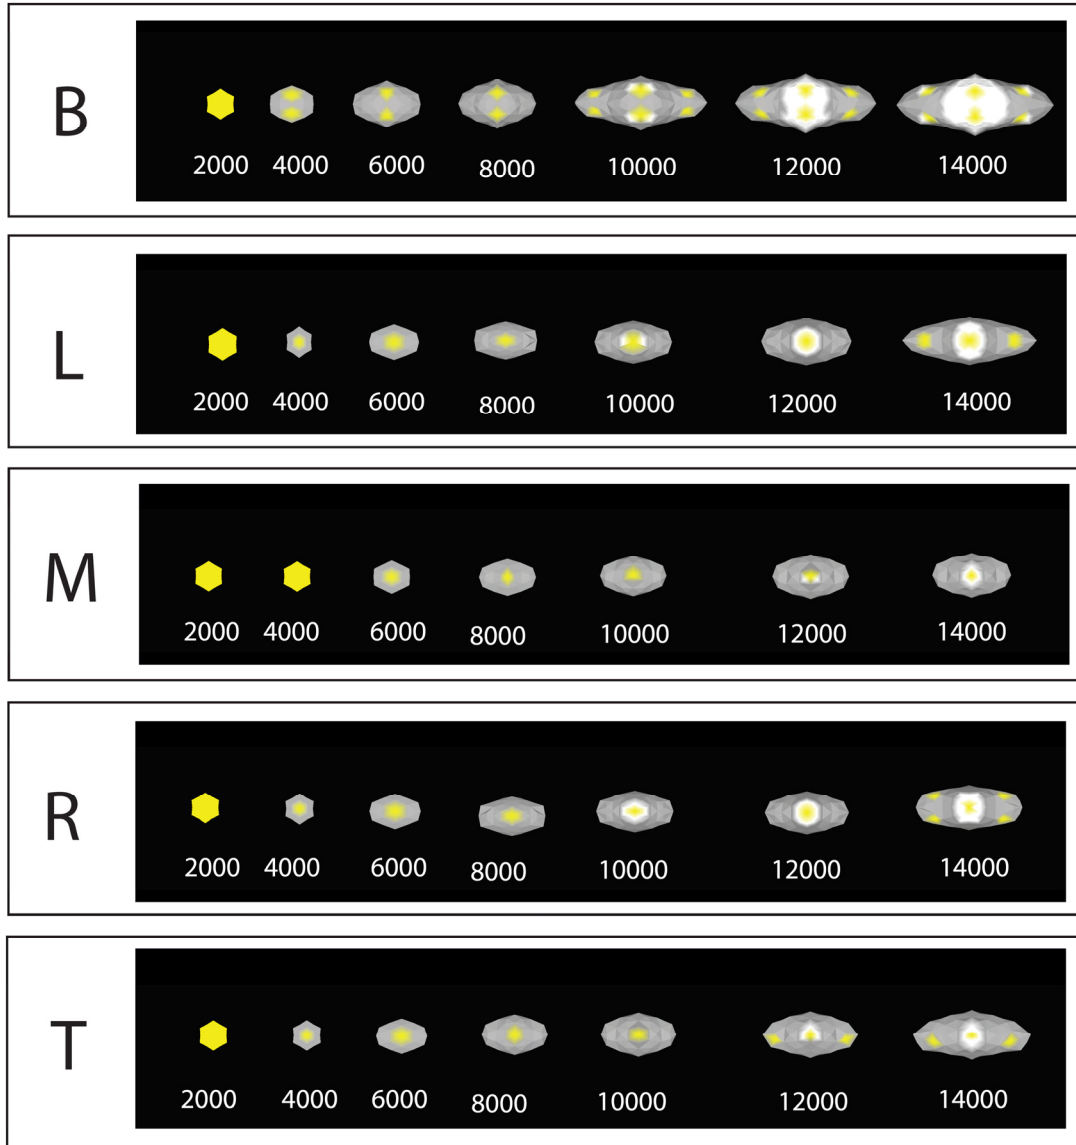

**Figure S1.** Occlusal view of enamel knot patterning histories. Enamel knots are indicated by yellow zones of epithelial differentiation. Numbers are model iterations (range 0–14000), a proxy for in silico developmental time. Knot pattern abbreviations: 'B', buccolingual (lateral); 'L', longitudinal; 'M', monocuspid; 'R', radial; 'T', triangular.

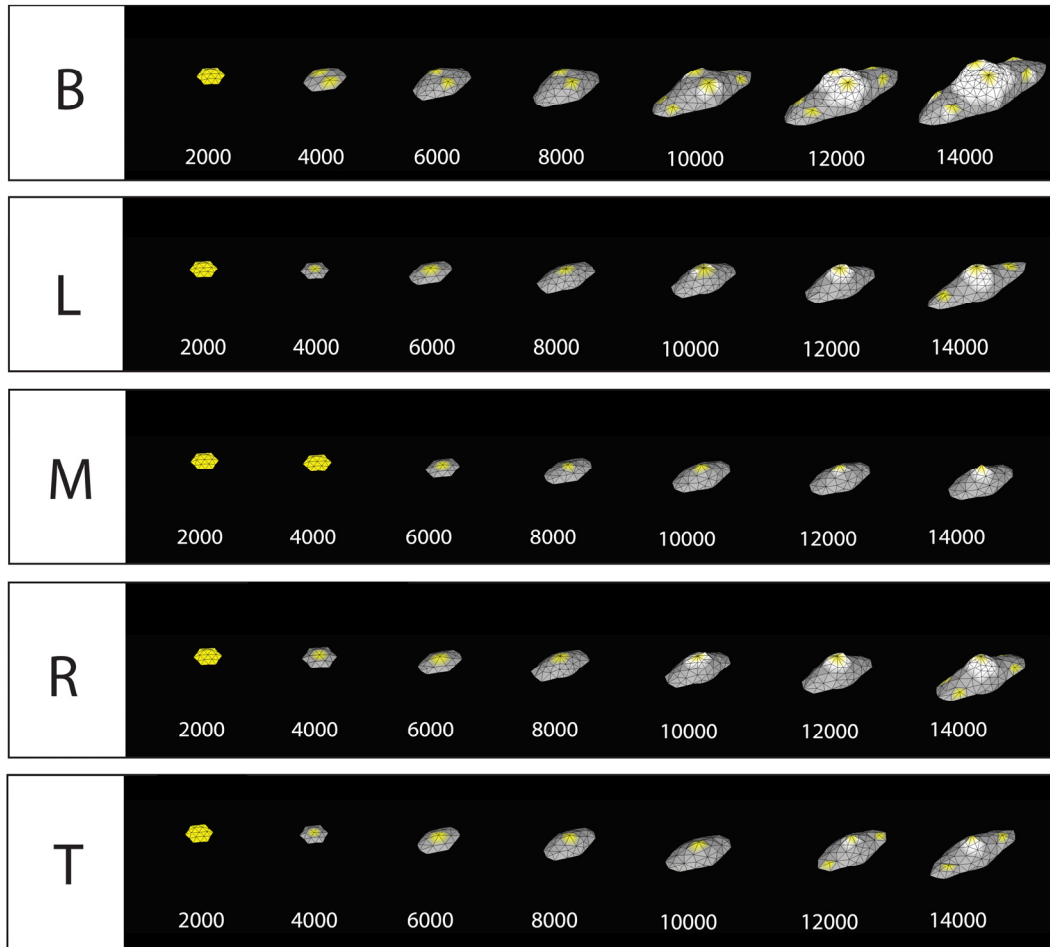

**Figure S2.** Oblique view of enamel knot patterning histories. Enamel knots are indicated by yellow zones of epithelial differentiation. Numbers are model iterations (range 0–14000), a proxy for developmental time. Knot pattern abbreviations: ‘B’, buccolingual (lateral); ‘L’, longitudinal; ‘M’, monocuspid; ‘R’, radial; ‘T’, triangular.

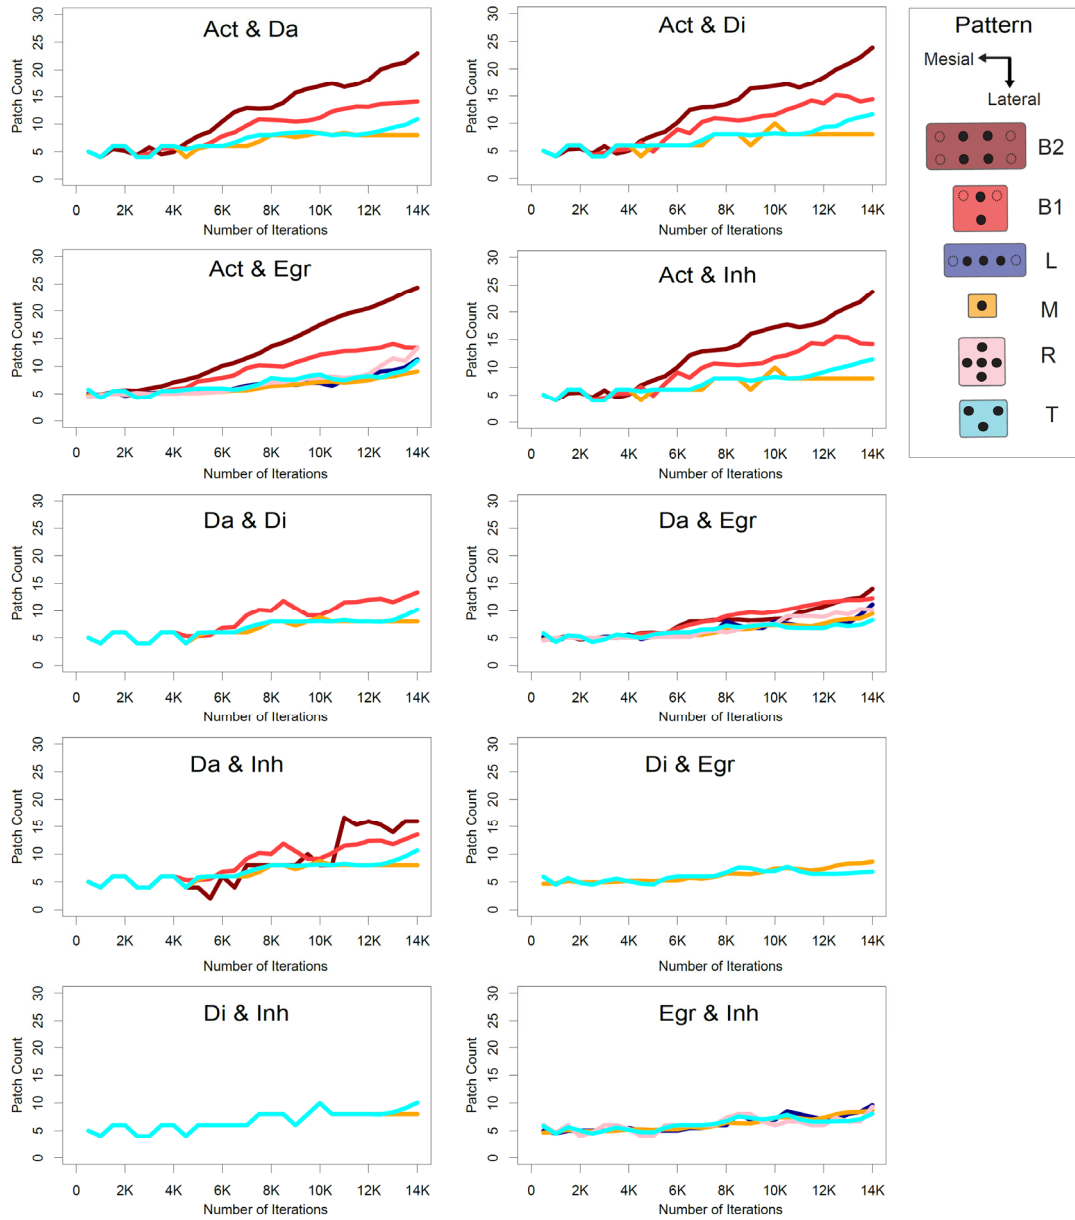

**Figure S3.** Developmental trajectories of tooth complexity for different enamel knot patterns. Tooth complexity measured with orientation patch count. Parameter abbreviations: Activator self-regulation (Act), activator diffusion rate (Da), inhibitor diffusion rate (Di), epithelial growth rate (Egr), and strength of inhibition (Inh).

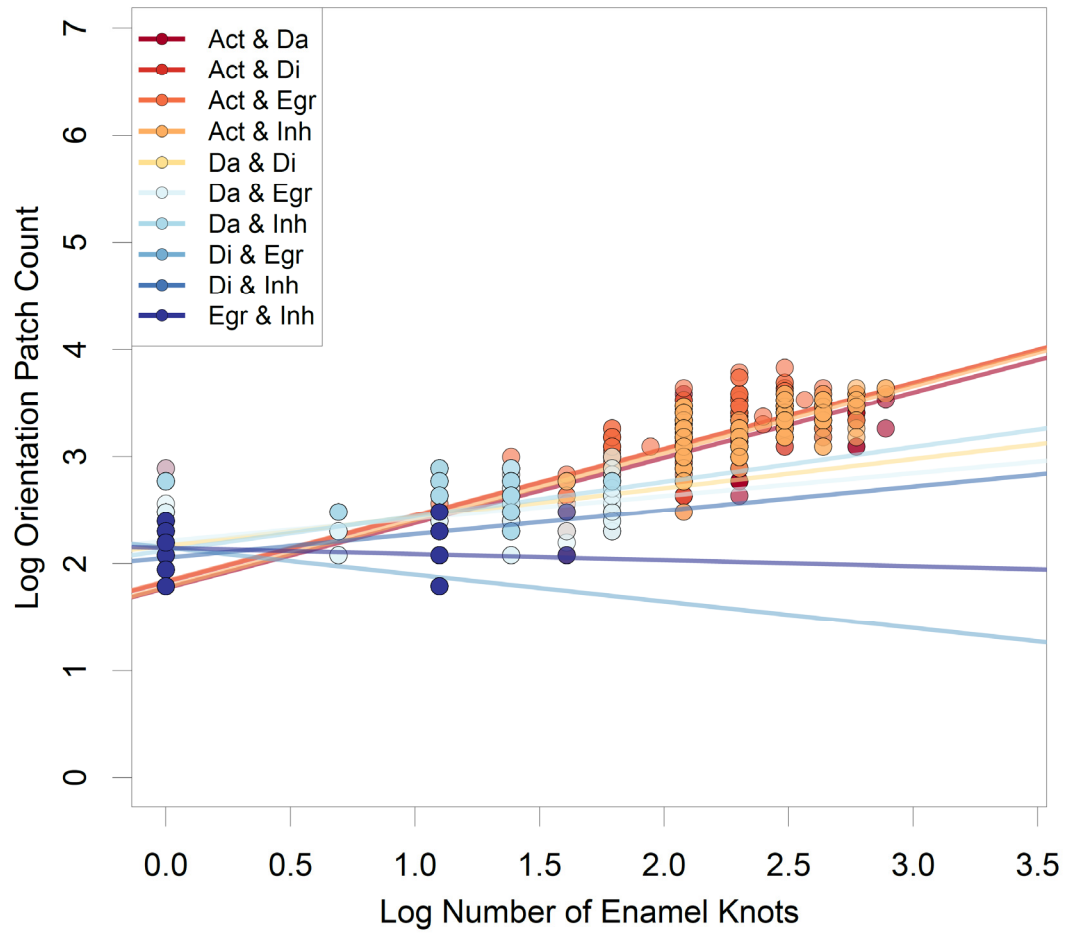

**Figure S4.** Log–Log major axis regressions of enamel knot number and orientation patch count for simulated tooth shapes ( $r$  score=0.69). Colors denote different developmental landscapes. Parameter abbreviations: Activator self-regulation (Act), activator diffusion rate (Da), inhibitor diffusion rate (Di), epithelial growth rate (Egr), and strength of inhibition (Inh).

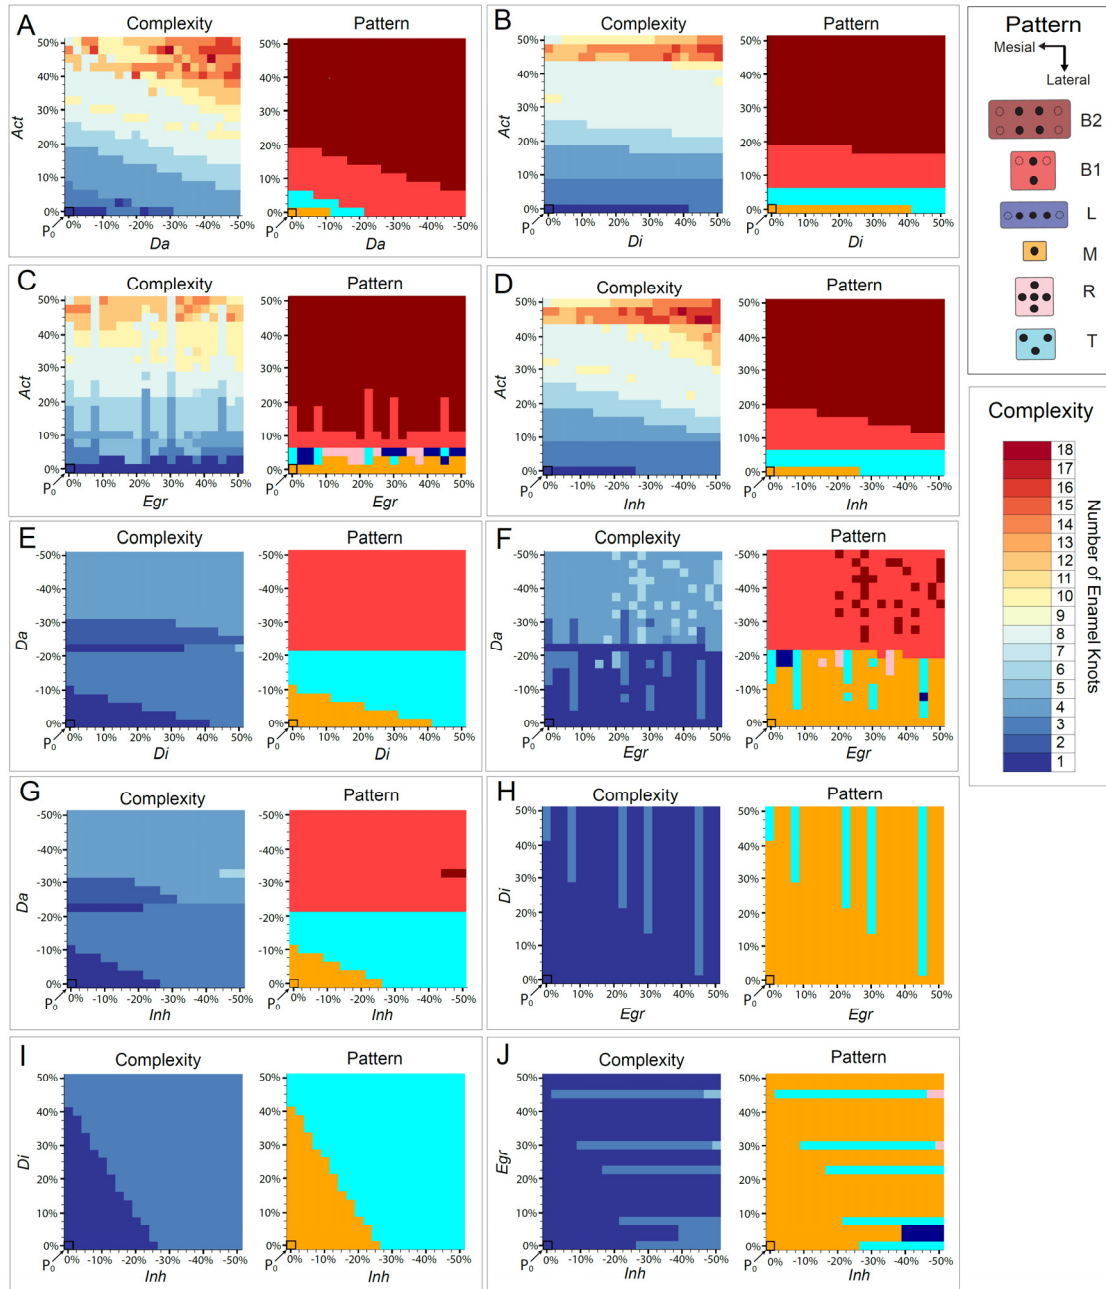

**Figure S5.** Heatmap representations of enamel knot number and pattern variation across different developmental landscapes. The starting parameter state ( $P_0$ ) is indicated in the bottom left corner. Axis values denote percentage changes ( $\pm$ ) in the parameter values relative to the ancestral state. Axis tick-marks denote the center of grid cells. Parameter abbreviations as follows: Activator self-regulation (Act), Activator diffusion rate (*Da*), inhibitor diffusion rate (*Di*), epithelial growth rate (*Egr*), and strength of inhibition (*Inh*).

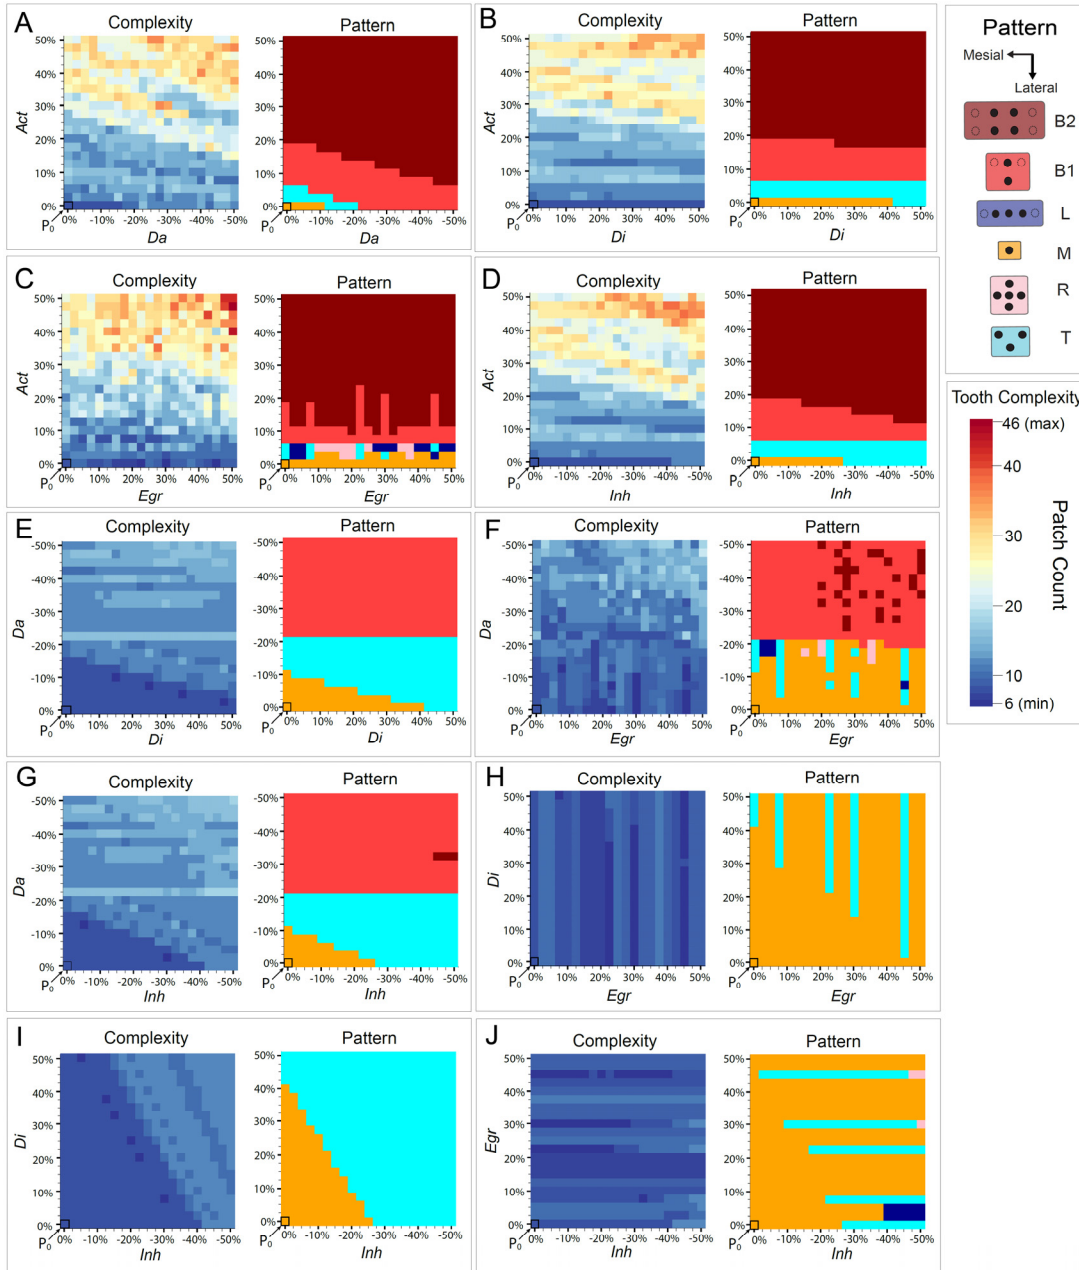

**Figure S6.** Heatmap representation of tooth surface complexity (orientation patch count) and knot pattern across different developmental landscapes. The starting parameter state ( $P_0$ ) is indicated in bottom left corner. Axis values denote percentage changes ( $\pm$ ) in parameter values relative to the ancestral state. Axis tick-marks denote the center of grid cells. Parameter abbreviations as follows: Activator self-regulation (Act), Activator diffusion rate (Da), inhibitor diffusion rate (Di), epithelial growth rate (Egr), and the strength of inhibition (Inh).

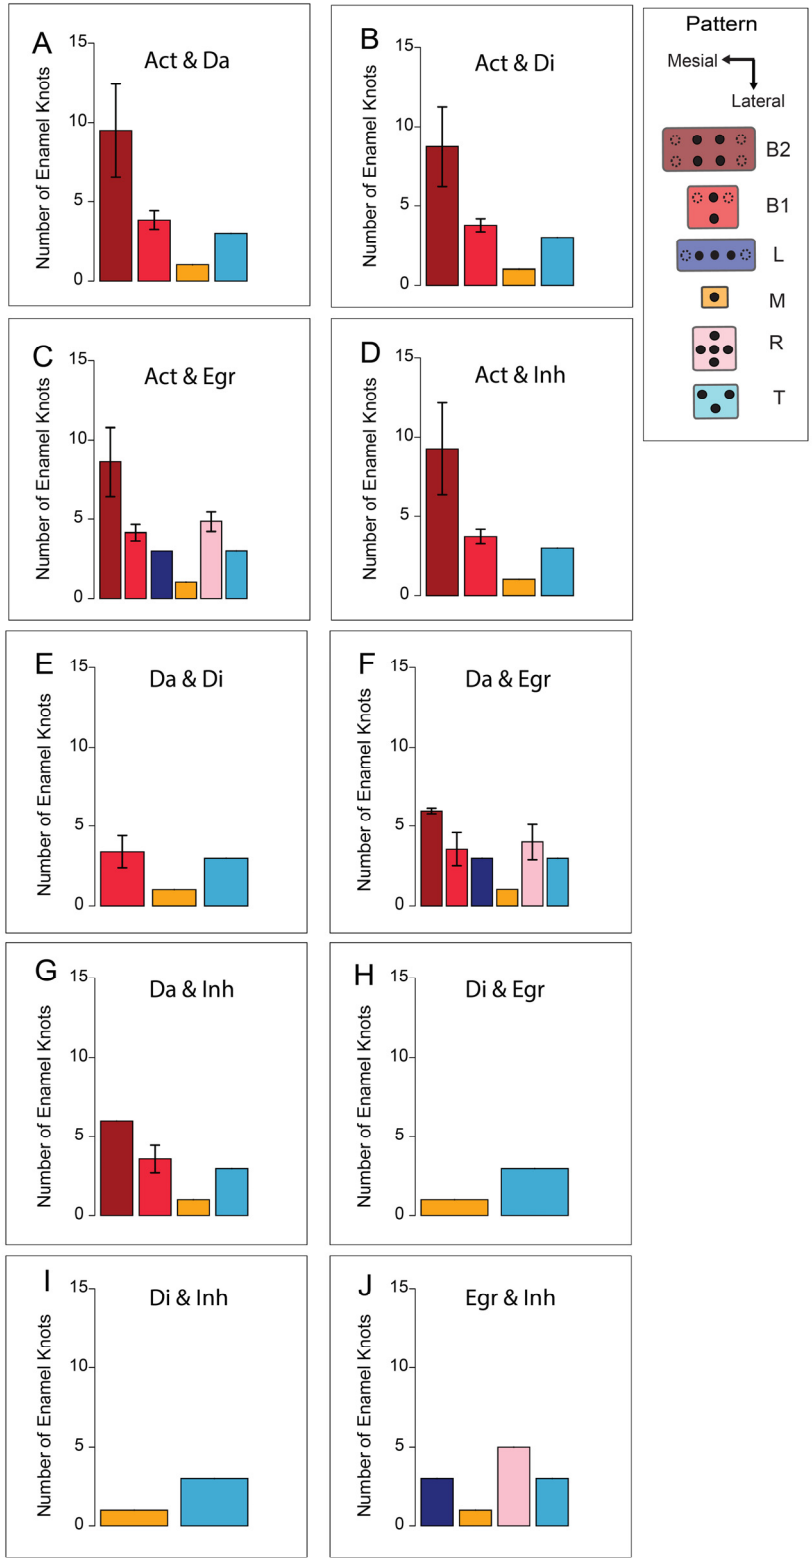

**Figure S7.** Bar plots of enamel knot number and pattern for different developmental landscapes. Error bars represent one standard deviation. Parameter abbreviations as follows: Activator self-regulation (Act), activator diffusion rate (Da), inhibitor diffusion rate (Di), epithelial growth rate (Egr), and the strength of inhibition (Inh).



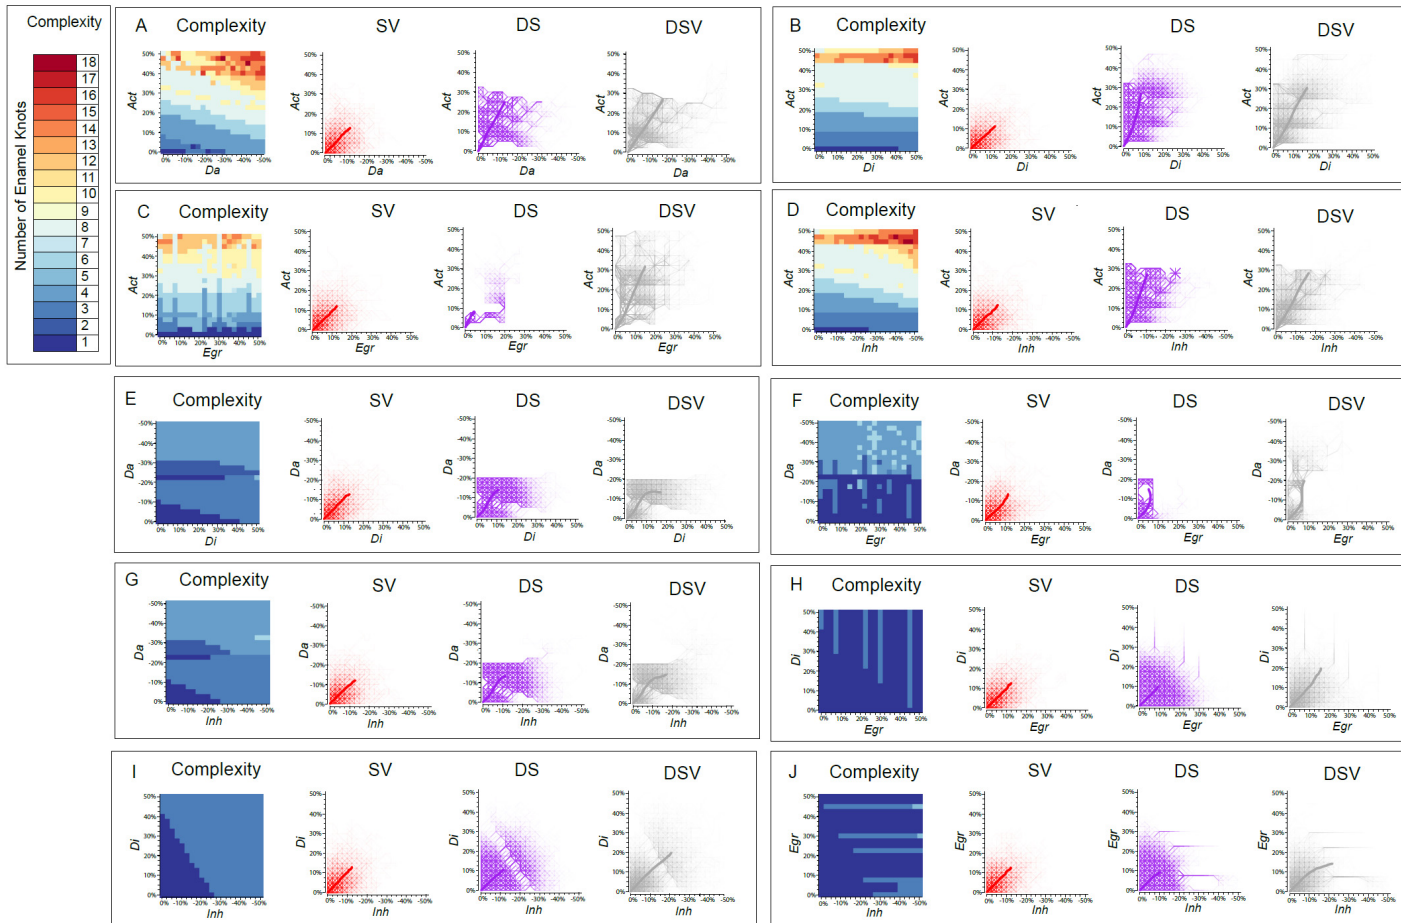

**Figure S8.** Evolutionary trajectories across different developmental landscapes under three evolutionary models. Bold lines are the average trajectory through the landscape (10,000 simulations, each run for a maximum of 30 generations). Landscapes are ordinated with the starting state ( $P_0$ ) in the lower left corner. Faint lines are a random sample of 5,000 trajectories. Parameter abbreviations as follows: Activator self-regulation (Act), activator diffusion rate (Da), inhibitor diffusion rate (Di), epithelial growth rate (Egr), and strength of inhibition (Inh).

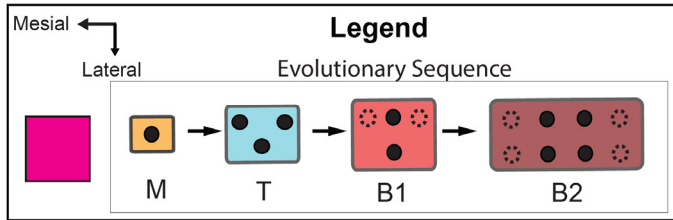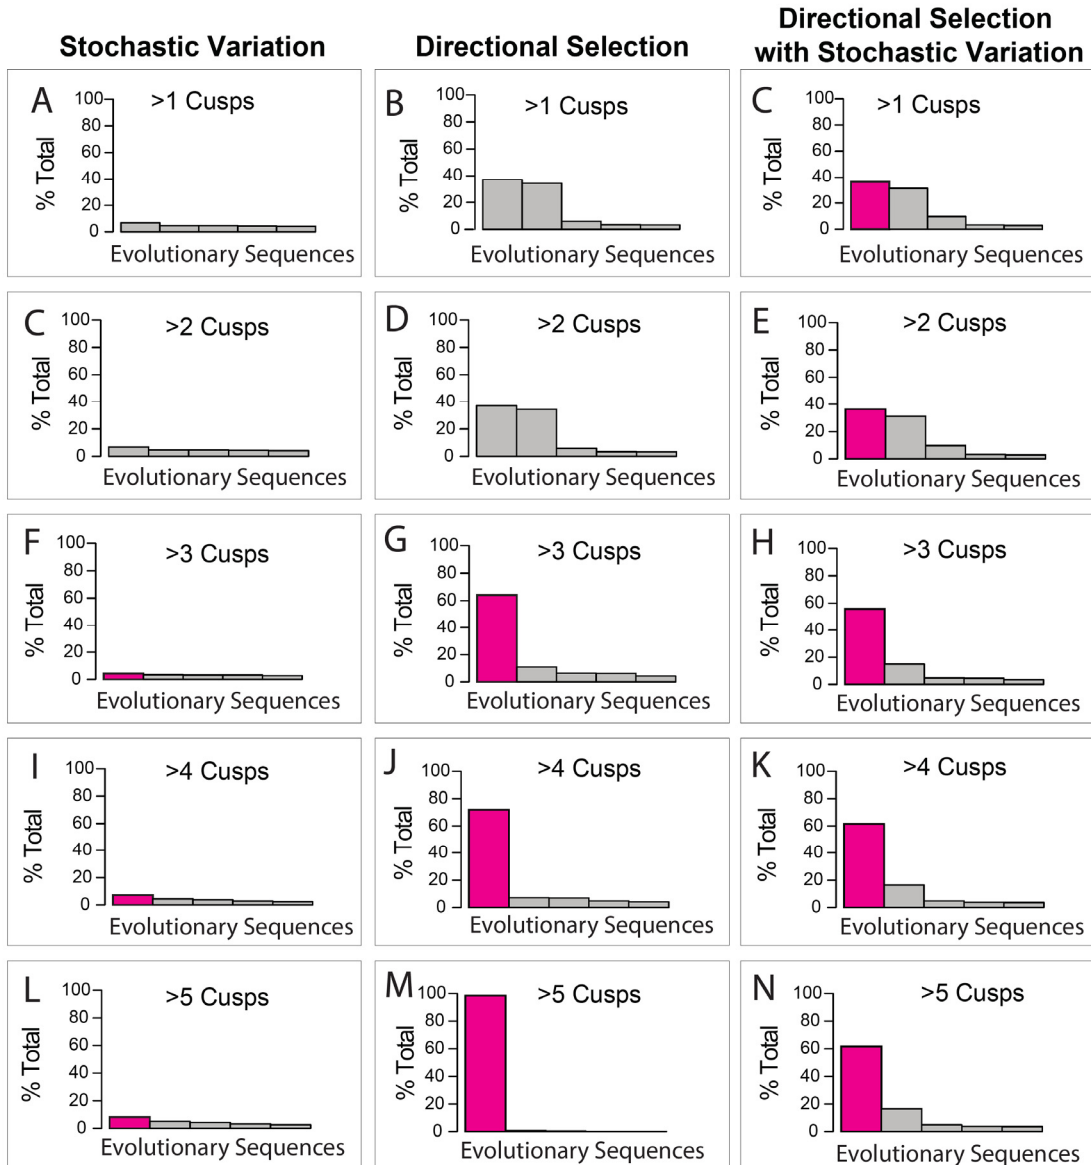

**Figure S9.** Frequency distributions of the most common evolutionary sequences for each evolutionary model at different tooth complexity levels: (A, C, F, I, L) stochastic variation (SV); (B, D, G, J, M) directional selection (DS), (C, E, H, K, N) directional selection combined with stochastic variation (DSV). Magenta highlights 'M>T>B1>B2' transformation sequence.

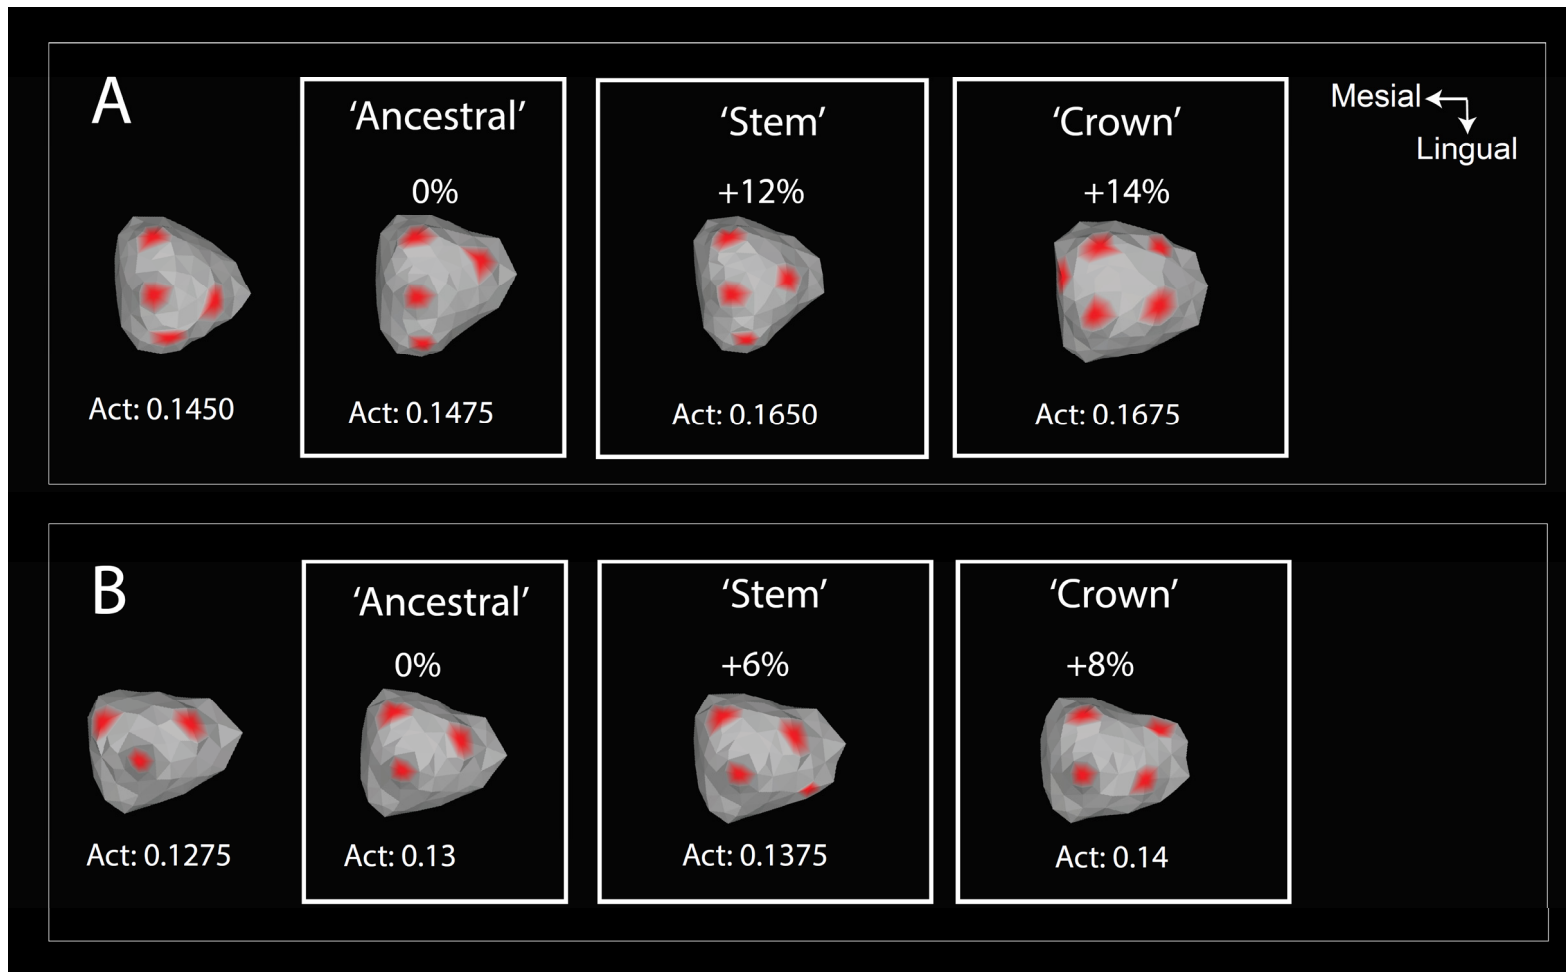

**Figure S10.** Sensitivity of different tooth bud growth biases to increases in activation (Act). (A) Enamel knot patterns originating from an 'ancestral' tooth bud with low levels of anterior growth, low levels of posterior growth, and a strong lingual bias in activator expression. (B) Enamel knot patterns originating from ancestral parameters as with 'A', but with more posterior growth. Red denotes growth factor concentration at view threshold=0.2.

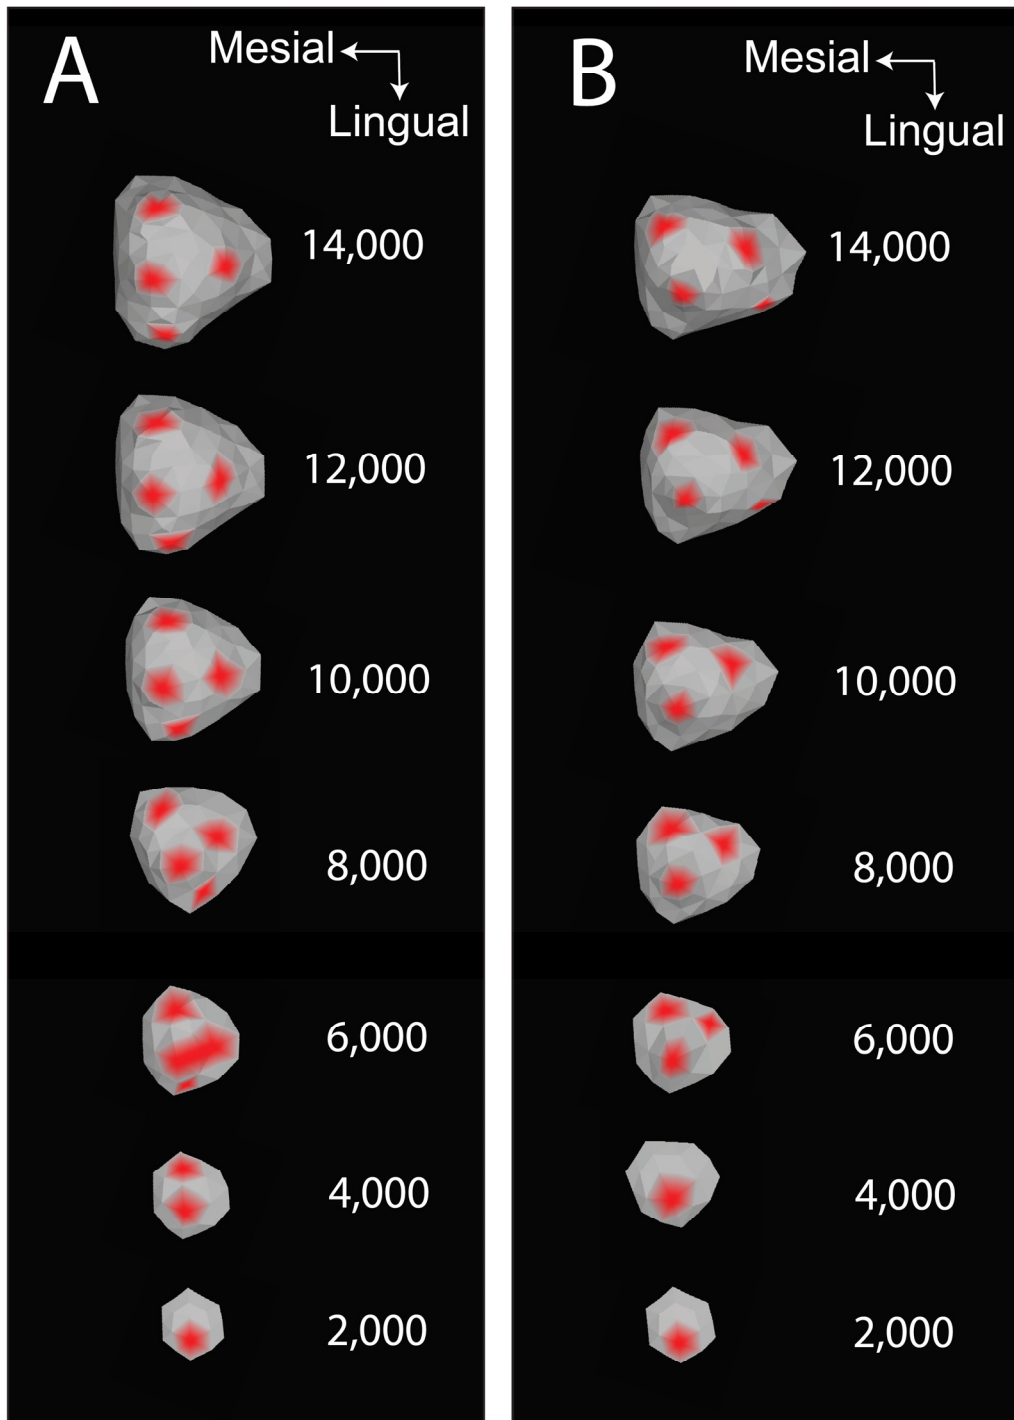

**Figure S11.** Patterning changes leading to distinct origins of posterolingual knots in ToothMaker simulations. (A) Formation of a lingual cingulum-like structure on an ancestral tooth subject to low-levels of anterior and posterior growth, and a strong lingual bias in activator expression. (B) As for (A), but with increased posterior growth. Red denotes growth factor concentration at view threshold=0.2. Numbers indicate the model iteration number, a proxy for developmental time.

**Table S1.** ToothMaker parameter settings used to generate the initial tooth state ( $P_0$ ) for constructing the developmental landscapes and for the ancestral state in trait evolution simulations. Blue rows denote parameters that were varied in the pairwise simulations.

| Parameter                                                             | Abbreviation | Class         | Starting Value |
|-----------------------------------------------------------------------|--------------|---------------|----------------|
| Protein degradation rate                                              | Deg          | Degradation   | 0.076          |
| Growth factor threshold                                               | Set          | Growth factor | 0.95           |
| Growth factor secretion rate                                          | Sec          | Growth factor | 0.14           |
| Growth factor diffusion rate                                          | Ds           | Growth factor | 1.0            |
| Activator self-regulation                                             | Act          | Activator     | 0.1            |
| Activator diffusion rate                                              | Da           | Activator     | 0.05           |
| Buccal bias                                                           | Bbi          | Activator     | 0.1            |
| Lingual bias                                                          | Lbi          | Activator     | 0.1            |
| Initial activator concentration                                       | Ina          | Activator     | 0.0            |
| Initial inhibitor threshold                                           | Int          | Inhibitor     | 0.19           |
| Inhibition of activator                                               | Inh          | Inhibitor     | 10.0           |
| Inhibitor diffusion rate                                              | Di           | Inhibitor     | 1.0            |
| Epithelial proliferation rate                                         | Egr          | Epithelium    | 0.01           |
| Downward vector of growth                                             | Dgr          | Epithelium    | 10500.0        |
| Differentiation rate                                                  | Dff          | Epithelium    | 0.0002         |
| Traction between neighboring cells                                    | Adh          | Epithelium    | 0.005          |
| Young's modulus (stiffness)                                           | Rep          | Epithelium    | 1.5            |
| Mechanical traction from the borders to the nucleus                   | Ntr          | Epithelium    | 0.000013       |
| Anterior bias                                                         | Abi          | Epithelium    | 5.0            |
| Posterior bias                                                        | Pbi          | Epithelium    | 5.0            |
| Mesenchymal proliferation rate                                        | Mgr          | Mesenchyme    | 1000.0         |
| Border growth, amount of mesenchyme in the anterior–posterior region. | Bgr          | Mesenchyme    | 0.9            |
| Mesenchyme mechanical resistance                                      | Boy          | Mesenchyme    | 0.1            |
| Radius of initial conditions                                          | Rad          | Initial size  | 3.0            |
| Distance from 0 where the borders are defined                         | Swi          | Initial size  | 1.4            |
| Width of border                                                       | Bwi          | Initial size  | 2.4            |

**Table S2.** Combinations of ToothMaker parameters used to construct developmental landscapes (blue). Parameter abbreviations: Activator self-regulation (Act), activator diffusion rate (Da), inhibitor diffusion rate (Di), epithelial growth rate (Egr), and inhibition of activation (Inh).  $P_{\min}$ : minimum parameter value;  $P_{\max}$ : maximum parameter value; Step: step size increment for each grid cell. Underlined values represent initial conditions ( $P_0$ ).

| <b>Parameter</b>                                                                                                                     | <b>Act</b><br>$P_{\min}$ : <u>0.1</u><br>$P_{\max}$ : <u>0.15</u><br>Step: $2.5 \times 10^{-3}$ | <b>Da</b><br>$P_{\min}$ : $2.5 \times 10^{-2}$<br>$P_{\max}$ : <u><math>5 \times 10^{-2}</math></u><br>Step: $1.25 \times 10^{-3}$ | <b>Di</b><br>$P_{\min}$ : <u>1</u><br>$P_{\max}$ : 1.5<br>Step: $2.5 \times 10^{-2}$ | <b>Egr</b><br>$P_{\min}$ : <u><math>1.0 \times 10^{-2}</math></u><br>$P_{\max}$ : $1.5 \times 10^{-2}$<br>Step: $2.5 \times 10^{-4}$ | <b>Inh</b><br>$P_{\min}$ : 5<br>$P_{\max}$ : <u>10</u><br>Step: 0.25 |
|--------------------------------------------------------------------------------------------------------------------------------------|-------------------------------------------------------------------------------------------------|------------------------------------------------------------------------------------------------------------------------------------|--------------------------------------------------------------------------------------|--------------------------------------------------------------------------------------------------------------------------------------|----------------------------------------------------------------------|
| <b>Act</b><br>$P_{\min}$ : <u>0.1</u><br>$P_{\max}$ : 0.15<br>Step: $2.5 \times 10^{-3}$                                             |                                                                                                 |                                                                                                                                    |                                                                                      |                                                                                                                                      |                                                                      |
| <b>Da</b><br>$P_{\min}$ : $2.5 \times 10^{-2}$<br>$P_{\max}$ : <u><math>5 \times 10^{-2}</math></u><br>Step: $1.25 \times 10^{-3}$   |                                                                                                 |                                                                                                                                    |                                                                                      |                                                                                                                                      |                                                                      |
| <b>Di</b><br>$P_{\min}$ : <u>1</u><br>$P_{\max}$ : 1.5<br>Step: $2.5 \times 10^{-2}$                                                 |                                                                                                 |                                                                                                                                    |                                                                                      |                                                                                                                                      |                                                                      |
| <b>Egr</b><br>$P_{\min}$ : <u><math>1.0 \times 10^{-2}</math></u><br>$P_{\max}$ : $1.5 \times 10^{-2}$<br>Step: $2.5 \times 10^{-4}$ |                                                                                                 |                                                                                                                                    |                                                                                      |                                                                                                                                      |                                                                      |
| <b>Inh</b><br>$P_{\min}$ : 5<br>$P_{\max}$ : <u>10</u><br>Step: 0.25                                                                 |                                                                                                 |                                                                                                                                    |                                                                                      |                                                                                                                                      |                                                                      |

**Table S3.** Variation in cusp pattern and cusp number on the upper second molar for 93 species of fossil and extant mammalian taxa. PPM=Protocone–Paracone–Metacone.

| Taxon                            | Order/Clade        | Status | Cusp Pattern | Cusp Number | PPM Angle |
|----------------------------------|--------------------|--------|--------------|-------------|-----------|
| <i>Abdounodus hamdii</i>         | Paenungulatomorpha | Fossil | T            | 6           | 64        |
| <i>Adapis parisiensis</i>        | Primates           | Fossil | T            | 4           | 66        |
| <i>Ailurus fulgens</i>           | Carnivora          | Extant | B2           | 13          | 85        |
| <i>Ailuropoda melanoleuca</i>    | Carnivora          | Extant | B2           | >13         | 88        |
| <i>Amblysomus hottentotus</i>    | Afrosoricida       | Extant | T            | 4           | 65        |
| <i>Apheliscus insidiosus</i>     | Macroscelidea      | Extant | B1           | 3           | 93        |
| <i>Archaeonycteris brailloni</i> | Chiroptera         | Fossil | B1           | 5           | 88        |
| <i>Archaeotherium mortoni</i>    | Artiodactylomorpha | Fossil | T            | 5           | 75        |
| <i>Artiocetus clavis</i>         | Artiodactyla       | Fossil | T            | 3           | NA        |
| <i>Basilosaurus cetoides</i>     | Artiodactyla       | Fossil | L            | 6           | NA        |
| <i>Bos taurus</i>                | Artiodactyla       | Extant | B2           | 8           | 89        |
| <i>Cantius abditus</i>           | Primates           | Fossil | T            | 8           | 64        |
| <i>Caperea marginata</i>         | Artiodactyla       | Extant | E            | 0           | NA        |
| <i>Castor canadensis</i>         | Rodentia           | Extant | B2           | 7           | 90        |
| <i>Cavia porcellus</i>           | Rodentia           | Extant | B2           | 5           | 90        |
| <i>Cocomys lingchaensis</i>      | Glirres            | Fossil | B1           | 8           | 81        |
| <i>Cymbalophus cuniculus</i>     | Perissodactyla     | Fossil | T            | 4           | 76        |
| <i>Cynocephalus volans</i>       | Dermoptera         | Extant | T            | 8           | 67        |
| <i>Dasypus novemcinctus</i>      | Cingulata          | Extant | M            | 1           | NA        |
| <i>Dawsonolagus antiquus</i>     | Glirres            | Fossil | T            | 4           | 70        |
| <i>Diacodexis antunesi</i>       | Artiodactyla       | Fossil | B1           | 5           | 80        |
| <i>Didelphis virginiana</i>      | Didelphimorphia    | Extant | T            | 7           | 67        |
| <i>Didolodus multicuspis</i>     | Meridiungulata     | Fossil | T            | 6           | 70        |
| <i>Dormaalocyon latouri</i>      | Carnivoraformes    | Fossil | B1           | 5           | 99        |
| <i>Dromiciops gliroides</i>      | Microbiotheria     | Extant | B1           | 6           | 82        |
| <i>Echinops telfairi</i>         | Afrosoricida       | Extant | B1           | 4           | 95        |
| <i>Ectocion parvus</i>           | Euungulata         | Fossil | T            | 8           | 60        |
| <i>Equus caballus</i>            | Perissodactyla     | Extant | B2           | 9           | 97        |
| <i>Erinaceus europaeus</i>       | Eulipotyphla       | Extant | T            | 5           | 55        |
| <i>Eritherium azzouzororum</i>   | Tethytheria        | Fossil | B2           | 5           | 97        |
| <i>Galeopterus variegatus</i>    | Dermoptera         | Extant | T            | 8           | 65        |
| <i>Gomphos elkema</i>            | Glirres            | Fossil | T            | 4           | 62        |
| <i>Gracilocyon solei</i>         | Carnivoraformes    | Fossil | B1           | 6           | 86        |
| <i>Haldanodon exspectatus</i>    | Docodonta          | Fossil | T            | 2           | NA        |
| <i>Hapalops elongatus</i>        | Pilosa             | Fossil | M            | 1           | NA        |
| <i>Henkelotherium guimarotae</i> | Dryolestida        | Fossil | T            | 4           | 43        |
| <i>Hippopotamus amphibius</i>    | Artiodactyla       | Extant | B2           | 7           | 81        |
| <i>Homo sapiens</i>              | Primates           | Extant | T            | 4           | 70        |

|                                       |                    |        |    |    |     |
|---------------------------------------|--------------------|--------|----|----|-----|
| <i>Hyopsodus paulus</i>               | Perissodactyla     | Fossil | T  | 6  | 56  |
| <i>Icaronycteris menui</i>            | Chiroptera         | Fossil | B1 | 5  | 88  |
| <i>Ictidomys tridecemlineatus</i>     | Rodentia           | Extant | B2 | 3  | 87  |
| <i>Lama glama</i>                     | Artiodactyla       | Extant | B2 | 7  | 91  |
| <i>Lemur catta</i>                    | Primates           | Extant | T  | 5  | 78  |
| <i>Leptictis dakotensis</i>           | Leptictida         | Fossil | B1 | 4  | 80  |
| <i>Loxodonta africana</i>             | Proboscidea        | Extant | B2 | 17 | 95  |
| <i>Lycophocyon hutchisoni</i>         | Carnivora          | Fossil | T  | 3  | 72  |
| <i>Maelestes gobiensis</i>            | Cimolesta          | Fossil | B1 | 4  | 91  |
| <i>Manis pentadactyla</i>             | Pholidota          | Extant | E  | 0  | NA  |
| <i>Meshippus bairdi</i>               | Perissodactyla     | Fossil | T  | 5  | 73  |
| <i>Mesonyx obtusidens</i>             | Mesonychia         | Fossil | T  | 4  | 67  |
| <i>Metacheiromys marshi</i>           | Palaeanodonta      | Fossil | E  | 0  | NA  |
| <i>Moeritherium lyonsi</i>            | Proboscidea        | Fossil | B2 | 5  | 81  |
| <i>Morganucodon watsoni</i>           | Morganucodonta     | Fossil | L  | 3  | NA  |
| <i>Myotis lucifugus</i>               | Chiroptera         | Extant | T  | 6  | 73  |
| <i>Notharctus tenebrosus</i>          | Primates           | Fossil | T  | 7  | 65  |
| <i>Nycteris thebaica</i>              | Chiroptera         | Extant | T  | 7  | 76  |
| <i>Ocepeia grandis</i>                | Paenungulatomorpha | Fossil | T  | 5  | 63  |
| <i>Orycteropus afer</i>               | Tubulidentata      | Extant | B2 | 4  | 90  |
| <i>Oryctolagus cuniculus</i>          | Lagomorpha         | Extant | B2 | 4  | 89  |
| <i>Paramys delicatus</i>              | Rodentia           | Fossil | T  | 4  | 47  |
| <i>Phenacodus intermedius</i>         | Euungulata         | Fossil | T  | 6  | 62  |
| <i>Phosphatherium escullei</i>        | Proboscidea        | Fossil | B2 | 5  | 90  |
| <i>Plesiadapis ploegi</i>             | Plesiadapiformes   | Fossil | T  | 6  | 61  |
| <i>Procavia capensis</i>              | Hyracoidea         | Extant | T  | 5  | 62  |
| <i>Protictis microlestes</i>          | Carnivoramorpha    | Fossil | T  | 6  | 66  |
| <i>Protolipterna ellipsodontoides</i> | Litopterna         | Fossil | T  | 6  | 63  |
| <i>Protungulatum donnae</i>           | Eutheria           | Fossil | T  | 6  | 67  |
| <i>Pteronotus parnellii</i>           | Chiroptera         | Extant | B2 | 7  | 84  |
| <i>Pteropus giganteus</i>             | Chiroptera         | Extant | B1 | 2  | NA  |
| <i>Ptilocercus lowii</i>              | Scandentia         | Extant | T  | 3  | 60  |
| <i>Pucadelphys andinus</i>            | Marsupialiformes   | Fossil | B1 | 9  | 80  |
| <i>Purgatorius titusi</i>             | Primates           | Fossil | T  | 4  | 79  |
| <i>Rattus norvegicus</i>              | Rodentia           | Extant | B2 | 6  | NA  |
| <i>Rhinopoma hardwickii</i>           | Chiroptera         | Extant | B1 | 7  | 91  |
| <i>Rhombomylus turpanensis</i>        | Glires             | Fossil | T  | 5  | 50  |
| <i>Rhynchocyon cirnei</i>             | Macroscelidea      | Extant | T  | 4  | 73  |
| <i>Saccopteryx bilineata</i>          | Chiroptera         | Extant | B2 | 7  | 101 |
| <i>Saimiri sciureus</i>               | Primates           | Extant | T  | 4  | 70  |
| <i>Solenodon paradoxus</i>            | Euliptophyla       | Extant | B1 | 6  | 88  |



|                               |                 |        |    |   |    |
|-------------------------------|-----------------|--------|----|---|----|
| <i>Sorex araneus</i>          | Euliptophyla    | Extant | T  | 7 | 74 |
| <i>Sus scrofa</i>             | Artiodactyla    | Extant | B2 | 6 | 80 |
| <i>Tachyglossus aculeatus</i> | Monotremata     | Extant | E  | 0 | NA |
| <i>Talpa europaea</i>         | Euliptophyla    | Extant | B2 | 6 | 80 |
| <i>Tamandua tetradactyla</i>  | Pilosa          | Extant | E  | 0 | NA |
| <i>Tarsius syrichta</i>       | Primates        | Extant | T  | 3 | 78 |
| <i>Todralestes variabilis</i> | Eutheria        | Fossil | T  | 4 | 78 |
| <i>Tribosphenomys minutus</i> | Glires          | Fossil | T  | 4 | 74 |
| <i>Trichechus manatus</i>     | Sirenia         | Extant | B2 | 6 | 87 |
| <i>Tupaia glis</i>            | Scandentia      | Extant | T  | 6 | 70 |
| <i>Tursiops truncatus</i>     | Artiodactyla    | Extant | M  | 1 | NA |
| <i>Uintacyon rudis</i>        | Carnivoraformes | Fossil | B1 | 4 | 83 |
| <i>Vulpavus ovatus</i>        | Carnivoraformes | Fossil | T  | 3 | 69 |
| <i>Zalambdalestes lechei</i>  | Eutheria        | Fossil | T  | 4 | 78 |

**Table S4.** ToothMaker parameters states used to generate 'ancestral' placental tooth shapes. 'Ancestral state 1' = Fig. 5A, 'Ancestral state 2' = Fig. 5B.

| <b>Parameter</b>                                                      | <b>Abbreviation</b> | <b>Ancestral State 1</b> | <b>Ancestral State 2</b> |
|-----------------------------------------------------------------------|---------------------|--------------------------|--------------------------|
| Protein degradation rate                                              | Deg                 | 0.076                    | 0.076                    |
| Growth factor threshold                                               | Set                 | 0.95                     | 0.95                     |
| Growth factor secretion rate                                          | Sec                 | 0.14                     | 0.14                     |
| Growth factor diffusion rate                                          | Ds                  | 1.0                      | 1.0                      |
| Activator self-regulation                                             | Act                 | 0.1475                   | 0.13                     |
| Activator diffusion rate                                              | Da                  | 0.06                     | 0.06                     |
| Buccal bias                                                           | Bbi                 | 0.00001                  | 0.00001                  |
| Lingual bias                                                          | Lbi                 | 0.5                      | 0.5                      |
| Initial activator concentration                                       | Ina                 | 0.0                      | 0.0                      |
| Initial inhibitor threshold                                           | Int                 | 0.19                     | 0.19                     |
| Inhibition of activator                                               | Inh                 | 11.0                     | 11.0                     |
| Inhibitor diffusion rate                                              | Di                  | 1.50                     | 1.50                     |
| Epithelial proliferation rate                                         | Egr                 | 0.012                    | 0.012                    |
| Downward vector of growth                                             | Dgr                 | 10500                    | 10500                    |
| Differentiation rate                                                  | Dff                 | 0.0002                   | 0.0002                   |
| Traction between neighboring cells                                    | Adh                 | 0.005                    | 0.005                    |
| Young's modulus (stiffness)                                           | Rep                 | 1.5                      | 1.5                      |
| Mechanical traction from the borders to the nucleus                   | Ntr                 | 0.00013                  | 0.00013                  |
| Anterior bias                                                         | Abi                 | 0.2                      | 0.2                      |
| Posterior bias                                                        | Pbi                 | 2.5                      | 3.0                      |
| Mesenchymal proliferation rate                                        | Mgr                 | 1000                     | 1000                     |
| Border growth, amount of mesenchyme in the anterior–posterior region. | Bgr                 | 0.9                      | 0.9                      |
| Mesenchyme mechanical resistance                                      | Boy                 | 0.1                      | 0.1                      |
| Radius of initial conditions                                          | Rad                 | 3.0                      | 3.0                      |
| Distance from 0 where the borders are defined                         | Swi                 | 1.5                      | 1.5                      |
| Width of border                                                       | Bwi                 | 3.0                      | 3.0                      |
